# Supplementary material for: Addressing palliative care and end-of-life issues in patients with advanced cancer: a systematic review of communication interventions for physicians not specialised in palliative care
Source: HighWire-hosted journal article supplement (doi:10.1136/bmjopen-2021-059652), 2022-06-01
Supplement: bmjopen-2021-059652supp003_data_supplement.pdf [file bmjopen-2021-059652supp003_data_supplement.pdf]

Table S3. Search strategy

| Number | Search strategy                                                                                                                                                                                                                                                                                                                                                                                                                                                                                                                                                                                                                                                                                                                                                                                   |
|--------|---------------------------------------------------------------------------------------------------------------------------------------------------------------------------------------------------------------------------------------------------------------------------------------------------------------------------------------------------------------------------------------------------------------------------------------------------------------------------------------------------------------------------------------------------------------------------------------------------------------------------------------------------------------------------------------------------------------------------------------------------------------------------------------------------|
| 1      | communic* OR convers* OR interpersonal skill* OR bad news OR serious news OR challenging news OR serious news OR advance care plan* OR advance clinical decision* OR psychosocial car* OR living will OR withholding treatment* OR discuss* OR address* OR talk* OR inform*.                                                                                                                                                                                                                                                                                                                                                                                                                                                                                                                      |
| 2      | train* OR educat* OR intervention OR course OR workshop OR program* OR curricul* OR practic* OR teach* OR improv* OR coach* OR project*.                                                                                                                                                                                                                                                                                                                                                                                                                                                                                                                                                                                                                                                          |
| 3      | palliative care OR end of life OR end-of-life OR end of life care OR end-of-life-care OR hospice car* OR terminal car* OR terminally ill OR supportive care OR respite car* OR advanced dis* OR advanced cancer OR critical ill* OR critically ill* OR critical car* OR imminent death OR dying OR limited life* OR last year of life OR end stage OR end-stage OR life-limiting illness OR shared decision making OR shared decision-making OR involv* family caregivers OR support* family caregivers OR prepare* for the future OR elicit* values OR deal* with emotions OR foster* relationship OR goals-of-care OR goals of care OR advance care plan* OR transition to palliative* OR prognosis OR advance directives OR emotional support* OR bad news OR serious news OR challenging news |
| 4      | physician* OR doctor* OR practitioner* OR clinician* OR generalist* OR general practitioner* OR professional* OR fellow* OR junior-doctor* OR oncologist* OR medical*                                                                                                                                                                                                                                                                                                                                                                                                                                                                                                                                                                                                                             |
| 5      | (cancer* OR onco* OR carcinom* OR tumor OR tumour OR malign* OR neoplasm* OR haematol* OR melanoma*                                                                                                                                                                                                                                                                                                                                                                                                                                                                                                                                                                                                                                                                                               |
| 6      | 1 AND 2 AND 3 AND 4 AND 5                                                                                                                                                                                                                                                                                                                                                                                                                                                                                                                                                                                                                                                                                                                                                                         |
