# Supplementary material for: Addressing palliative care and end-of-life issues in patients with advanced cancer: a systematic review of communication interventions for physicians not specialised in palliative care
Source: HighWire-hosted journal article supplement (doi:10.1136/bmjopen-2021-059652), 2022-06-01
Supplement: bmjopen-2021-059652supp004_data_supplement.pdf [file bmjopen-2021-059652supp004_data_supplement.pdf]

Table S4. Intervention characteristics of N = 22 interventions

| Name of the Intervention                                                     | Publication (country)          | Setting                                                                               | 1. Aim; 2. Content and learning activities; 3. Addressed PC/EoL issue(s)                                                                                                                                                                                                                                                                                                              |
|------------------------------------------------------------------------------|--------------------------------|---------------------------------------------------------------------------------------|---------------------------------------------------------------------------------------------------------------------------------------------------------------------------------------------------------------------------------------------------------------------------------------------------------------------------------------------------------------------------------------|
| An Illness-Trajectory Communication Curriculum                               | Cannone et al., 2019 (USA)     | 8-module workshop over 8 weeks (weekly 2-hour sessions)                               | 1. Improving communication skills with regard to BBN;<br>2. Sessions on 8 different pertinent communication challenges each consisting of a didactic lecture and small group role-play sessions with SP plus face-to-face sessions to discuss the learned content (BBN based on SPIKES protocol);<br>3. BBN, interacting with relatives, communicating in the palliative care setting |
| Avatar-mediated training in a virtual world                                  | Andrade et al., 2010 (USA)     | 10-minute video and one encounter with avatar SP (individual training)                | 1. Educating medical trainees on delivering bad news in a virtual world;<br>2. Computer-based tutorial on SPIKES protocol and interaction with a SP avatar in a virtual room;<br>3. BBN                                                                                                                                                                                               |
| Belgian Interuniversity Curriculum – communication skills training (BIC-CST) | Liénard et al., 2010 (Belgium) | 40-h training program spread over an 8-month period bimonthly in small group sessions | 1. Improving residents' BBN skills with regard to communication contents and the BBN process;<br>2. Theoretical information, role plays with some sessions focusing on two-person and some sessions focusing on three-person consultations;<br>3. BBN                                                                                                                                 |
| Brief Breaking Bad News (BBN) communication skills training module           | Gorniewicz et al., 2017 (USA)  | 60-minute training module viewed on a CD-ROM or website                               | 1. Improving communication skills in BBN;<br>2. Video clips of actual patients describing communication situations involving BBN, quiz questions on how to respond to a challenging communication situation, videos of simulated doctor-patient encounters with annotations;<br>3. BBN                                                                                                |
| Communication skills training (CST)                                          | Butow et al., 2008 (Australia) | 1.5-day workshop with 3-6 participants and four 1.5 h monthly video-conferences       | 1. Increasing oncologists' skills in eliciting and responding to emotional cues;<br>2. Previously handed out booklet, presentation of principles, a DVD modelling ideal behavior, monthly video-conferences incorporating role-play of doctor-generated scenarios with SP;<br>3. Dealing with emotions                                                                                |

| Name of the Intervention                                               | Publication (country)          | Setting                                                                                                        | 1. Aim; 2. Content and learning activities; 3. Addressed PC/EoL issue(s)                                                                                                                                                                                                                                                                                                                                                                                                  |
|------------------------------------------------------------------------|--------------------------------|----------------------------------------------------------------------------------------------------------------|---------------------------------------------------------------------------------------------------------------------------------------------------------------------------------------------------------------------------------------------------------------------------------------------------------------------------------------------------------------------------------------------------------------------------------------------------------------------------|
| Communication Skills Training                                          | Baile et al., 1999, (USA)      | Two 5-hour-workshops (participants attended only one of them)                                                  | <ol style="list-style-type: none"> <li>1. Improving communication skills and patient management skills of oncologists;</li> <li>2. Two workshops: one on breaking bad news (based on SPIKES-protocol) and one on managing difficult patient situations (focus on managing stressful patient and family encounters) - each consisting of a didactic lecture, discussions and role-plays in small groups;</li> <li>3. BBN, managing patient reactions to illness</li> </ol> |
| Communication Skills Training - adapted version of the workshop on BBN | Fujimori, et al., 2003 (Japan) | 5-hour workshop imbedded into a 2 or 3-day workshop on palliative care                                         | <ol style="list-style-type: none"> <li>1. Increasing confidence in communicating with cancer patients;</li> <li>2. One workshop from Baile et al. consisting of a didactic lecture and role plays on BBN (based on SPIKES protocol);</li> <li>3. BBN</li> </ol>                                                                                                                                                                                                           |
| Communication skills training (CST) based on patients preferences      | Fujimori et al., 2014 (Japan)  | 2-day workshop                                                                                                 | <ol style="list-style-type: none"> <li>1. Improving empathic communication and effective behaviors of oncologists and their confidence in their ability to communicate with patients;</li> <li>2. Computer-aided didactic lecture with text and video, role plays with SP, discussion on role playing (all based on self-developed SHARE framework on BBN);</li> <li>3. BBN</li> </ol>                                                                                    |
| Communication Skills Training (CST) workshop                           | Yamada et al., 2018; (Japan)   | 2-day workshop                                                                                                 | <ol style="list-style-type: none"> <li>1. Increasing intrapersonal empathy;</li> <li>2. One-hour computer-aided didactic lecture with text and video (BBN based on the SHARE framework with focus on reassurance and emotional support), 8 hours of role plays with SP, discussions;</li> <li>3. Empathy/dealing with emotions, BBN</li> </ol>                                                                                                                            |
| Communication training in oncology                                     | Lenzi et al., 2011 (USA)       | 3-day course                                                                                                   | <ol style="list-style-type: none"> <li>1. Positively affecting oncologists' attitudes, self-efficacy and knowledge in communication;</li> <li>2. Formal lectures, small group work, role plays, interviews with SP, reflective exercises;</li> <li>3. BBN, dealing with denial</li> </ol>                                                                                                                                                                                 |
| COM-ON-p                                                               | Goelz et al., 2011 (Germany)   | 11-hour (1.5 day) workshop in groups of 8-9 participants plus an individual coaching 2 weeks later (half hour) | <ol style="list-style-type: none"> <li>1. Improving oncologists' communication behavior toward the patient and significant other skills in consultations focusing on the transition to palliative care;</li> <li>2. Role plays with SP and significant others focusing on individually defined learning goals, coaching sessions to discuss how to transfer individual learning goals into routine consultations with a facilitator;</li> </ol>                           |

| Name of the Intervention                                                          | Publication (country)                                    | Setting                                                                                                                   | 1. Aim; 2. Content and learning activities; 3. Addressed PC/EoL issue(s)                                                                                                                                                                                                                                                                                                                                     |
|-----------------------------------------------------------------------------------|----------------------------------------------------------|---------------------------------------------------------------------------------------------------------------------------|--------------------------------------------------------------------------------------------------------------------------------------------------------------------------------------------------------------------------------------------------------------------------------------------------------------------------------------------------------------------------------------------------------------|
| Comskil Training Curriculum                                                       | Bylund et al., 2010 (USA)                                | Five 3-h modules (participants were free to choose the frequency and amount of modules taking part in)                    | 3. Transition to palliative care<br>1. Improving communication skills;<br>2. Five modules on 5 different PC/EoL topics consisting of a didactic presentation, videos to demonstrate the skills and role-plays with SP in small groups;<br>3. BBN; shared decision making, responding to patient anger; discussing prognosis; discussing transition to palliative care                                        |
| Comskil Training Curriculum – adapted version (module about discussing prognosis) | Brown et al., 2010 (USA)                                 | 2.5 to 3-hour workshop                                                                                                    | 1. Teaching five strategies to discuss prognosis in a manner that is a) tailored to the patient's needs, b) honest and realistic and c) provides hope and reassurance;<br>2. Written material, didactic lecture, presentation of exemplary videos, role plays with SP;<br>3. Discussing prognosis                                                                                                            |
| Goals-of-Care (GoC) communication skills and coaching intervention (INT)          | Annadurai et al., 2021 (USA); Bickell et al., 2020 (USA) | 2-hour group communication skills training and 4 coaching visits spread over half a year                                  | 1. Teaching oncologists to elicit patient values;<br>2. All participants: didactic lecture on importance of GoC discussions; additional for intervention group (IG): small group role play session, coaching in practice (joint visit with patient; all based on SPIKES and NURSE protocols);<br>3. Goals of care discussions                                                                                |
| Interact-Cancer (computer-assisted instruction program)                           | Hulsman et al., 2002 (Netherlands)                       | 4 modules of computer assisted individual training each lasting 1 hour (program can be interrupted and completed anytime) | 1. Improving communication behavior;<br>2. Computer assisted instruction-course with 4 modules: basic communication skills, breaking bad news, providing information effectively, dealing with patients' emotions – each course consisting of video examples of poor and adequate communication, written instructions and multiple-choice practice questions;<br>3. BBN, dealing with emotions               |
| ISM (integrating simulation model) with art-based teaching strategies             | Yakhforosha et al., 2018 (Iran)                          | 1-day workshop                                                                                                            | 1. Teaching empathic communication regarding BBN by integrating simulation with art-based teaching strategies;<br>2. Interactive lectures based on SPIKES-model, presentation of different artworks expressing patient scenarios (e.g. films, music, painting, poetry) with following discussion, role plays with SP, expression of learning activities in a BBN-checklist and a reflective essay;<br>3. BBN |

| Name of the Intervention                                                                                                  | Publication (country)                                         | Setting                                                                                                                                        | 1. Aim; 2. Content and learning activities; 3. Addressed PC/EoL issue(s)                                                                                                                                                                                                                                                                                                                                                                                                                                                                                                                                                                              |
|---------------------------------------------------------------------------------------------------------------------------|---------------------------------------------------------------|------------------------------------------------------------------------------------------------------------------------------------------------|-------------------------------------------------------------------------------------------------------------------------------------------------------------------------------------------------------------------------------------------------------------------------------------------------------------------------------------------------------------------------------------------------------------------------------------------------------------------------------------------------------------------------------------------------------------------------------------------------------------------------------------------------------|
| Oncotalk                                                                                                                  | Back et al., 2007 (USA)                                       | 4-day residential workshop in groups of 20                                                                                                     | <ol style="list-style-type: none"> <li>1. Teaching specific communication tasks linked to the patient's trajectory of illness;</li> <li>2. Theoretic overviews, reflective discussions, teaching of cognitive road maps for specific communication tasks and role plays with SP;</li> <li>3. BBN, discussing transitions to palliative care</li> </ol>                                                                                                                                                                                                                                                                                                |
| Patient-Centered Communication Intervention (VOICE-trial)                                                                 | Epstein et al., 2017 (USA)                                    | Physicians: Two sessions of 105-minute in-office training; patients and caregivers: 1-hour coaching session plus up to 3 follow-up phone calls | <ol style="list-style-type: none"> <li>1. Promoting patient-centered communication about disease course, prognosis, treatment decisions and end-of-life-care;</li> <li>2. Physicians' intervention: brief video and feedback from standardized patients including critique on audiotaped patient visits; patients' intervention: coaching session incorporating a question prompt list helping them bring their concerns to oncologist;</li> <li>3. Dealing with emotions, discussing prognosis, treatment decisions and end-of-life-care</li> </ol>                                                                                                  |
| Posttraining Consolidation Workshops after a basic training program                                                       | Delvaux et al., 2005 (Belgium); Razavi et al., 2003 (Belgium) | 2.5-day basic group-training program and six 3-hour consolidation workshops spread over a 3-months period                                      | <ol style="list-style-type: none"> <li>1. Improving physicians' communication skills in cancer care (basic program) and maintaining the newly acquired skills, ensure further improvements, and promote the transfer of skills to the clinical practice (consolidation workshops);</li> <li>2. Basic program: didactic lecture, small-group role play sessions, written material; consolidation workshops: role plays with systematic feedback based on clinical problems brought up by participants;</li> <li>3. BBN, dealing with emotions, detecting psychopathologic reactions to diagnosis and prognosis, interacting with relatives</li> </ol>  |
| SCOPE CD-ROM                                                                                                              | Tulsky et al., 2011 (USA)                                     | 1-hour communication lecture plus a CD-ROM training program (approx. 1 hour)                                                                   | <ol style="list-style-type: none"> <li>1. Improving oncologists' responses to patients' emotional concerns;</li> <li>2. Didactic lecture on communication skills and a tailored CD-ROM training program with exemplars of their own audio-recorded clinic visits;</li> <li>3. Dealing with emotions</li> </ol>                                                                                                                                                                                                                                                                                                                                        |
| TEAMS (training Oncologists and Empowering Patients in Effective Communication During Medical Consultations in Singapore) | Malhotra et al., 2019 (Singapore)                             | Online training program for physicians (completed individually, length not stated) and handing out a prompt sheet to patients                  | <ol style="list-style-type: none"> <li>1. Improving oncologists' empathic responses, discussions of prognosis and goals of care and promoting patient/caregiver-questions;</li> <li>2. Physicians intervention: training on 4 different communication topics (see goals of the intervention) each addressed with a review of the concept, a video on how it could be applied and a review of segments from own audiotaped conversations including feedback; patients' intervention: prompt sheet with possible questions about diagnosis and prognosis;</li> <li>3. Discussing prognosis, discussing goals of care, responding to emotions</li> </ol> |

| Name of the Intervention                                         | Publication (country)                 | Setting                                                                                                                      | 1. Aim; 2. Content and learning activities; 3. Addressed PC/EoL issue(s)                                                                                                                                                                                                                                                    |
|------------------------------------------------------------------|---------------------------------------|------------------------------------------------------------------------------------------------------------------------------|-----------------------------------------------------------------------------------------------------------------------------------------------------------------------------------------------------------------------------------------------------------------------------------------------------------------------------|
| Training on Shared Decision-Making About Palliative Chemotherapy | Henselmans et al., 2019 (Netherlands) | Two 3.5-hour group sessions in groups of 3-6 with approx. 2 weeks in-between and a booster session (1.5 hours) 6 weeks later | 1. Training oncologists on shared decision making (SDM) focused on palliative cancer treatment;<br>2. Instruction, modelling (i.e. videos illustrating SDM) and practice (role plays with SP) plus a follow up session to receive feedback on a video-recorded encounter from actual practice;<br>3. Shared decision making |

BBN = breaking bad news, SP = simulated patients
